# Supplementary material
Source: MDPI journal article supplement (https://www.mdpi.com/2073-4352/12/2/151)
Supplement: s1 [file s1 › crystals-1555341-supplementary.pdf]

# Fumarate Based Metal Organic Framework: An Effective Catalyst for the Transesterification of Used Vegetable Oil

Mohammed Rafi Shaik \*, Syed Farooq Adil \*, Zeid A. ALOthman, and Osamah M. Alduhaish \*

Department of Chemistry, College of Science, King Saud University, P.O. Box 2455, Riyadh 11451, Saudi Arabia; zaothman@ksu.edu.sa (Z.A.A.)

\* Correspondence: mrshaik@ksu.edu.sa (M.R.S.); sfadil@ksu.edu.sa (S.F.A.); oalduhaish@ksu.edu.sa (O.M.A.); Tel.: +966-11-46-70439 (M.R.S.)

## Characterization

The MOF-801 crystalline structure was determined using Bruker D2 Phaser X-ray diffractometer with Cu K $\alpha$  radiation ( $\lambda = 1.5418 \text{ \AA}$ ), with accelerating voltage and current of 30 kV and 10 mA, respectively. FT-IR spectra of MOF-801 was assessed on a Perkin Elmer 1000 FT-IR spectrometer at room temperature. The TGA was performed by heating the samples in N<sub>2</sub> flow using a Perkin-Elmer Thermogravimetric Analyzer 7 with a heating rate of 10 °C/min. The BET surface area and BJH pore volume were measured by N<sub>2</sub> adsorption-desorption isotherm using Micromeritics (Gemini VII, 2390 surface area and porosity USA). MOF-801 sample was degassed at a temperature of 120 °C for 3 h using nitrogen gas. The assessment of transesterification product was carried out by <sup>1</sup>H NMR spectroscopy using deuterated chloroform as solvent on a JEOL 400-MHz spectrometer (JEOL, Ltd., Tokyo, Japan) at ambient temperature. The NMR samples were prepared by dissolving 20 mg of the biodiesel product in 2 ml CDCl<sub>3</sub> solvent with 0.05% tetramethylsilane (TMS). The surface morphology and elemental composition was carried out using JEOL instrument (JED-2200 Series (Japan)).

**Citation:** Shaik, M.R.; Adil, S.F.; ALOthman, Z.A.; Alduhaish, O.M. Fumarate Based Metal–Organic Framework: An Effective Catalyst for the Transesterification of Used Vegetable Oil. *Crystals* **2022**, *12*, 151. <https://doi.org/10.3390/cryst12020151>

Academic Editor: Marta E. G. Mosquera

Received: 29 December 2021

Accepted: 16 January 2022c

Published: 21 January 2022

**Publisher's Note:** MDPI stays neutral with regard to jurisdictional claims in published maps and institutional affiliations.

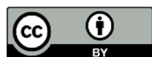

**Copyright:** © 2022 by the authors. Submitted for possible open access publication under the terms and conditions of the Creative Commons Attribution (CC BY) license (<https://creativecommons.org/licenses/by/4.0/>).

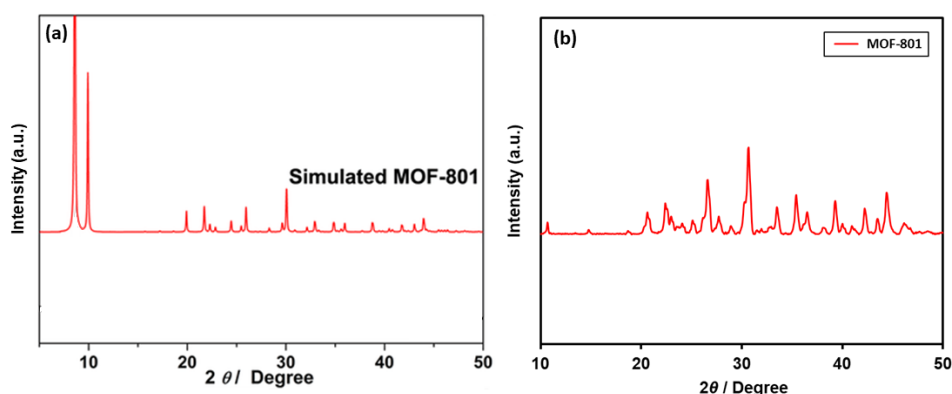

**Figure S1:** (a) Comparison of the simulated MOF-801 from the previously published data [1] and (b) as-synthesized XRD patterns of MOF-801.

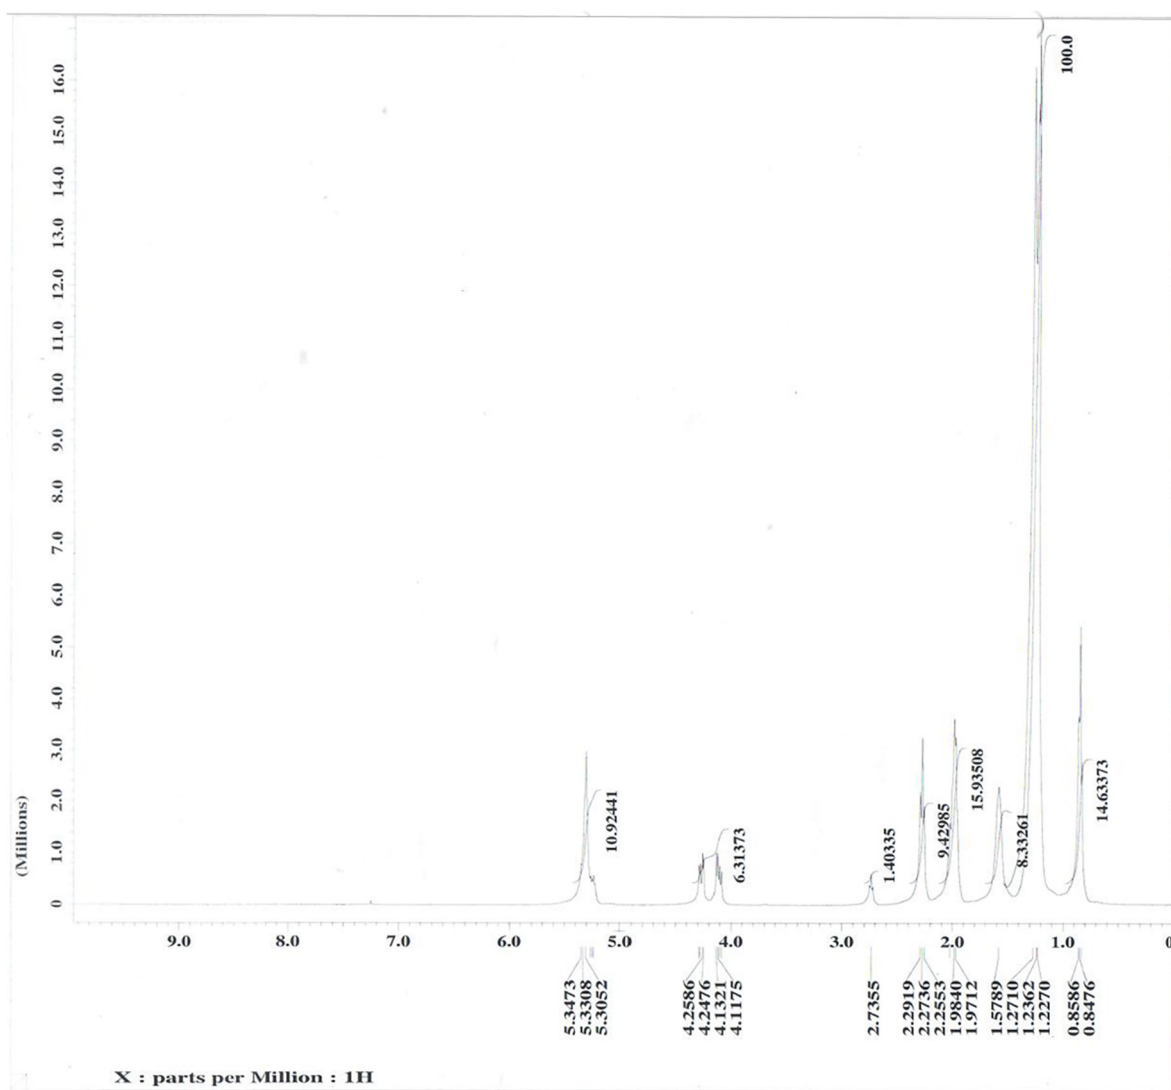

Figure S2:  $^1\text{H}$ -NMR spectrum of used vegetable oil (UVO).

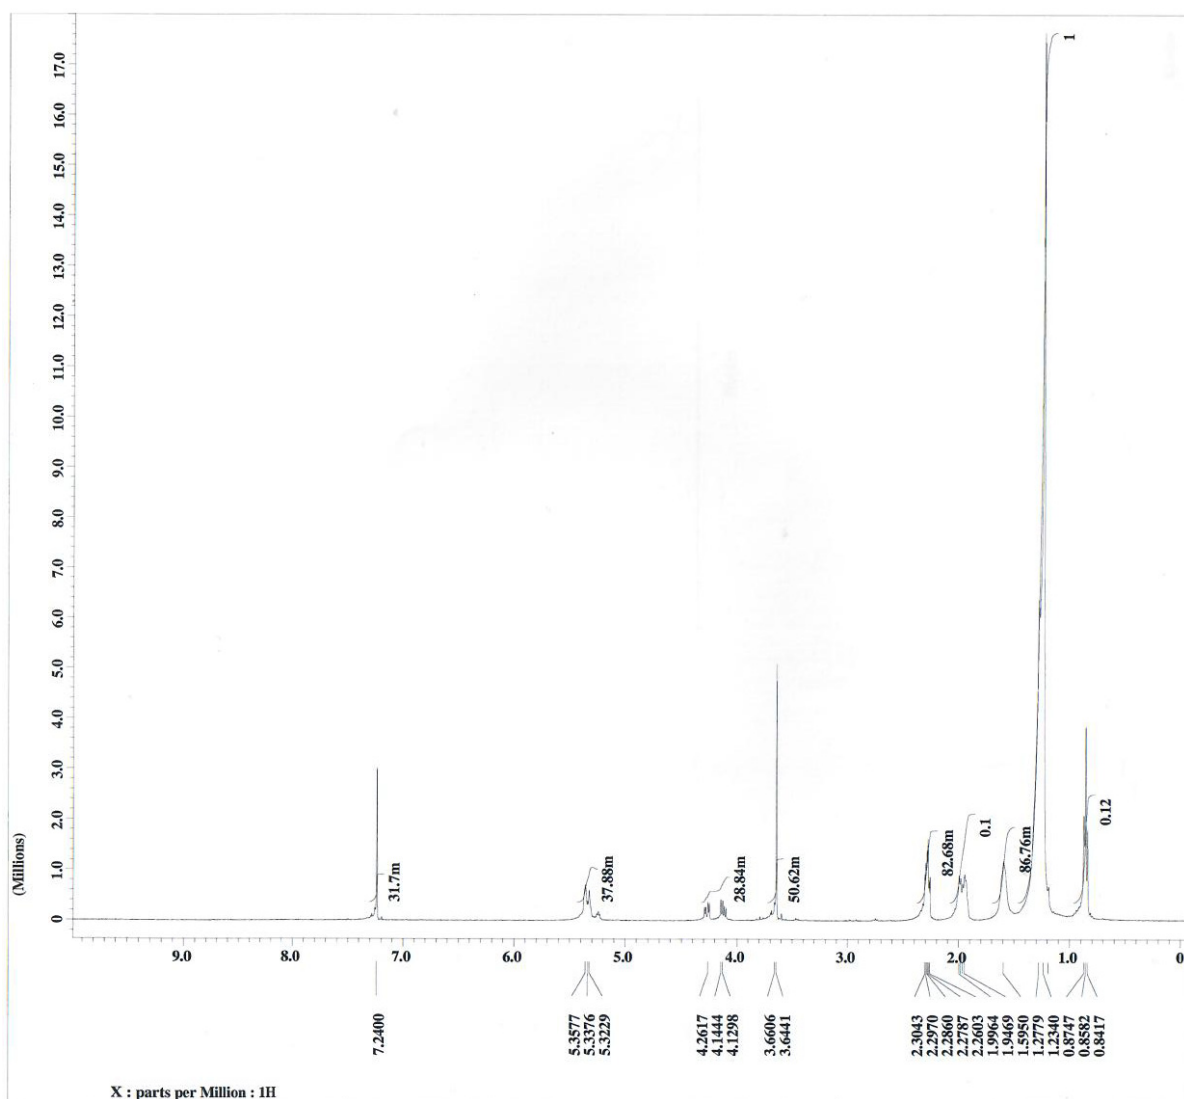

**Figure S3:**  $^1\text{H}$ -NMR spectrum of biodiesel synthesized by transesterification of UVO using MOF-801 catalyst (5 wt.% to oil) at 180 °C in 8 h with methanol to oil 50 wt.%.

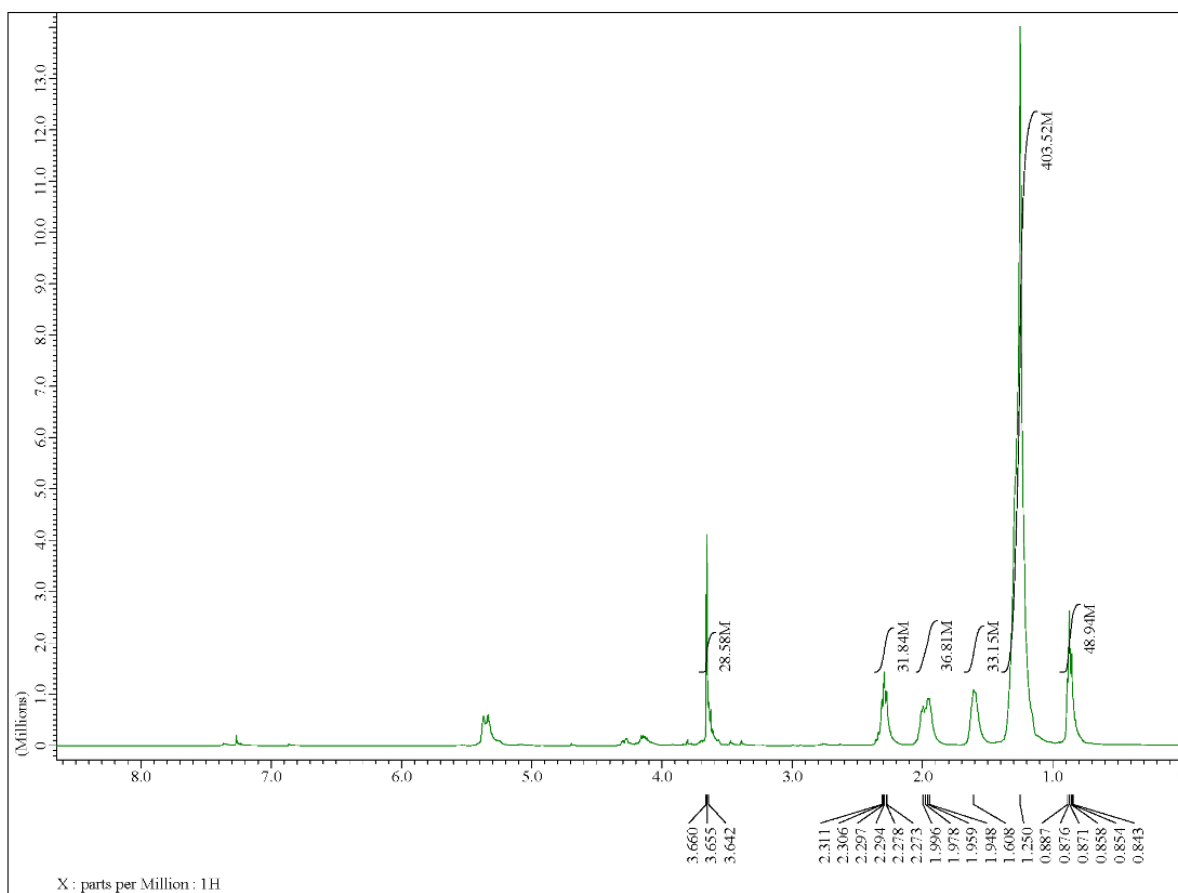

**Figure S4:**  $^1\text{H}$ -NMR spectrum of biodiesel synthesized by transesterification of UVO using MOF-801 catalyst (10 wt.% to oil) at 180 °C in 8 h with methanol to oil 50 wt.%.

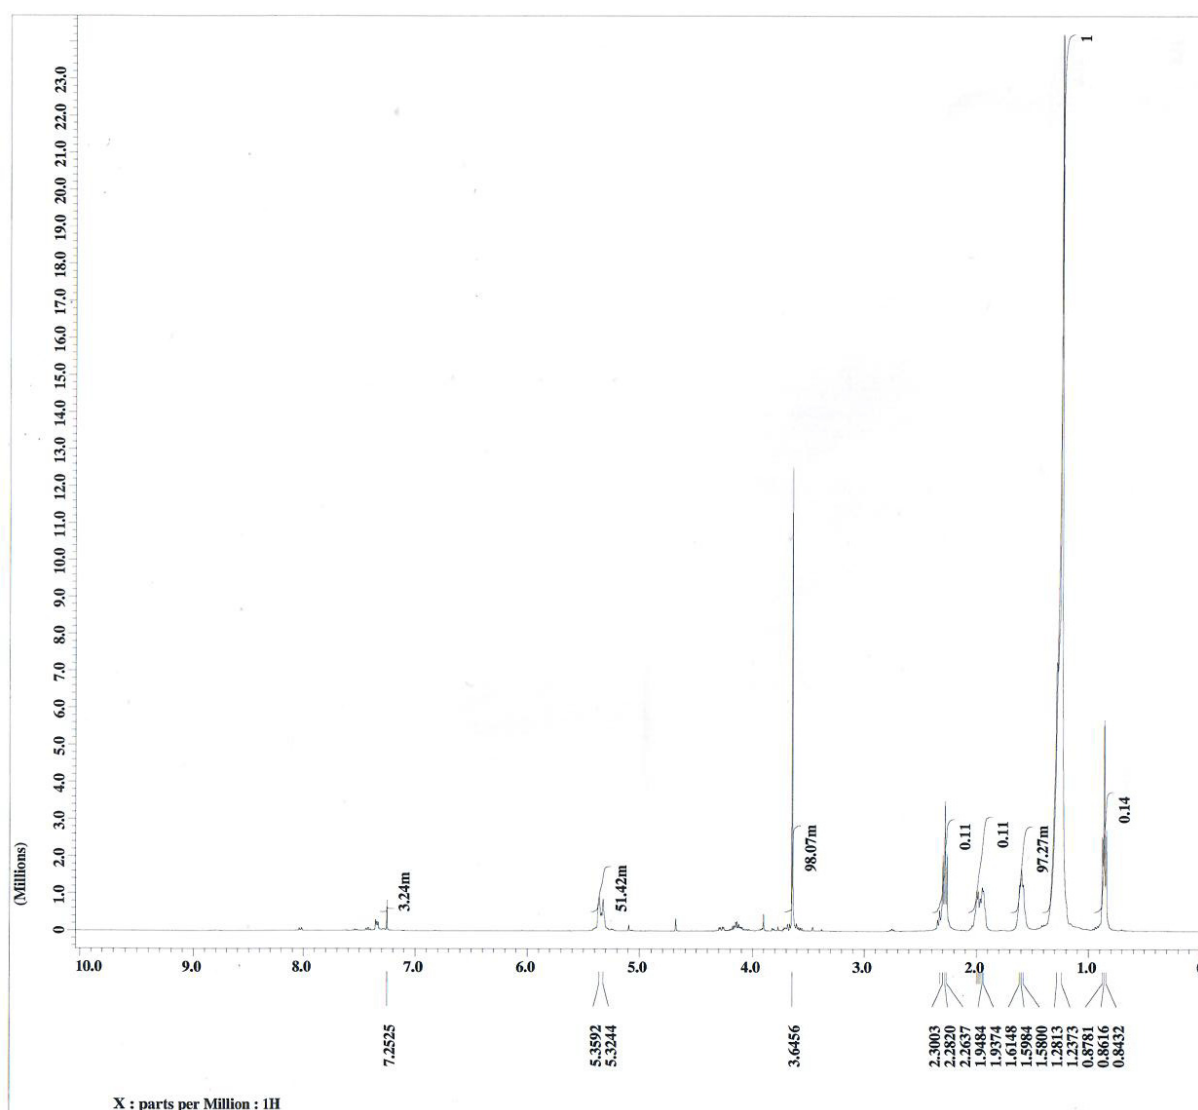

**Figure S5:**  $^1\text{H}$ -NMR spectrum of biodiesel synthesized by transesterification of UVO using MOF-801 catalyst (15 wt.% to oil) at  $180\text{ }^\circ\text{C}$  in 8 h with methanol to oil 50 wt.%.

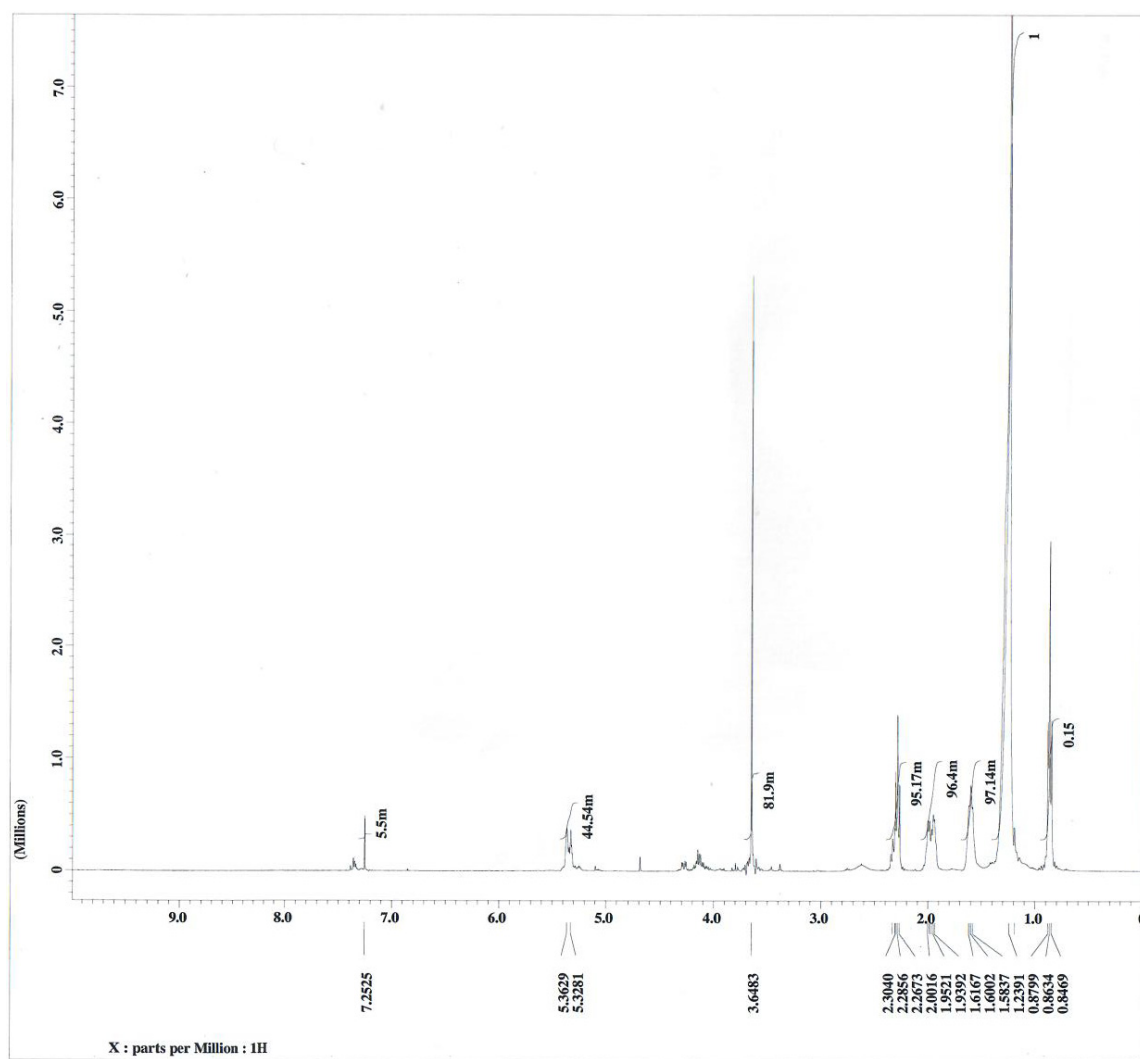

**Figure S6:**  $^1\text{H}$ -NMR spectrum of biodiesel synthesized by transesterification of UVO using MOF-801 catalyst (20 wt.% to oil) at 180 °C in 8 h with methanol to oil 50 wt.%.

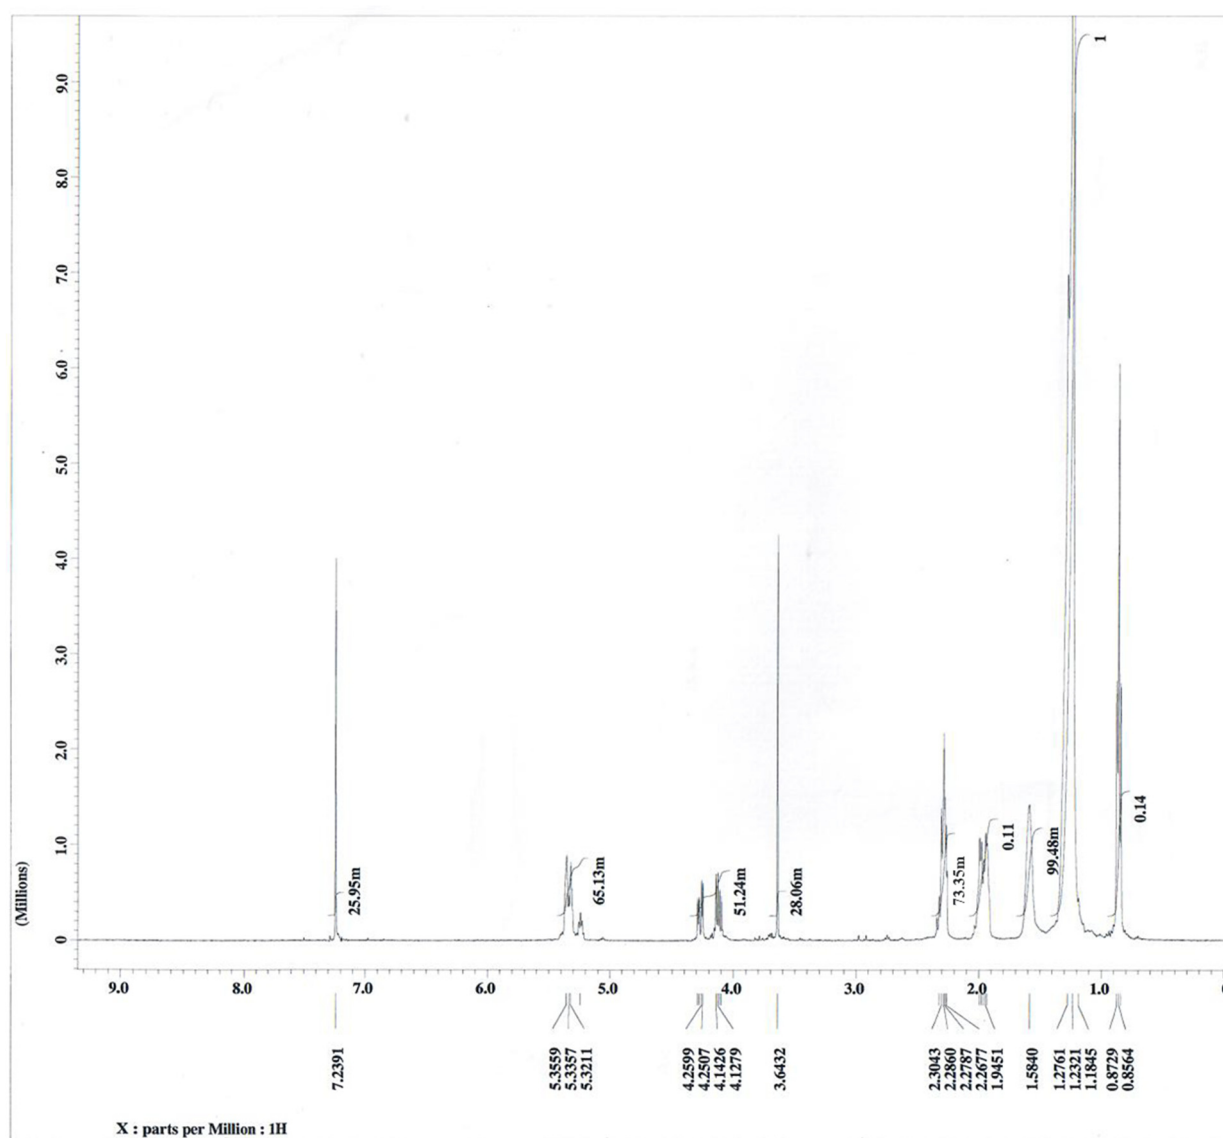

**Figure S7:**  $^1\text{H}$ -NMR spectrum of biodiesel synthesized by transesterification of UVO using MOF-801 catalyst (10 wt.% to oil) at  $180^\circ\text{C}$  in 8 h with methanol to oil 30 wt.%.

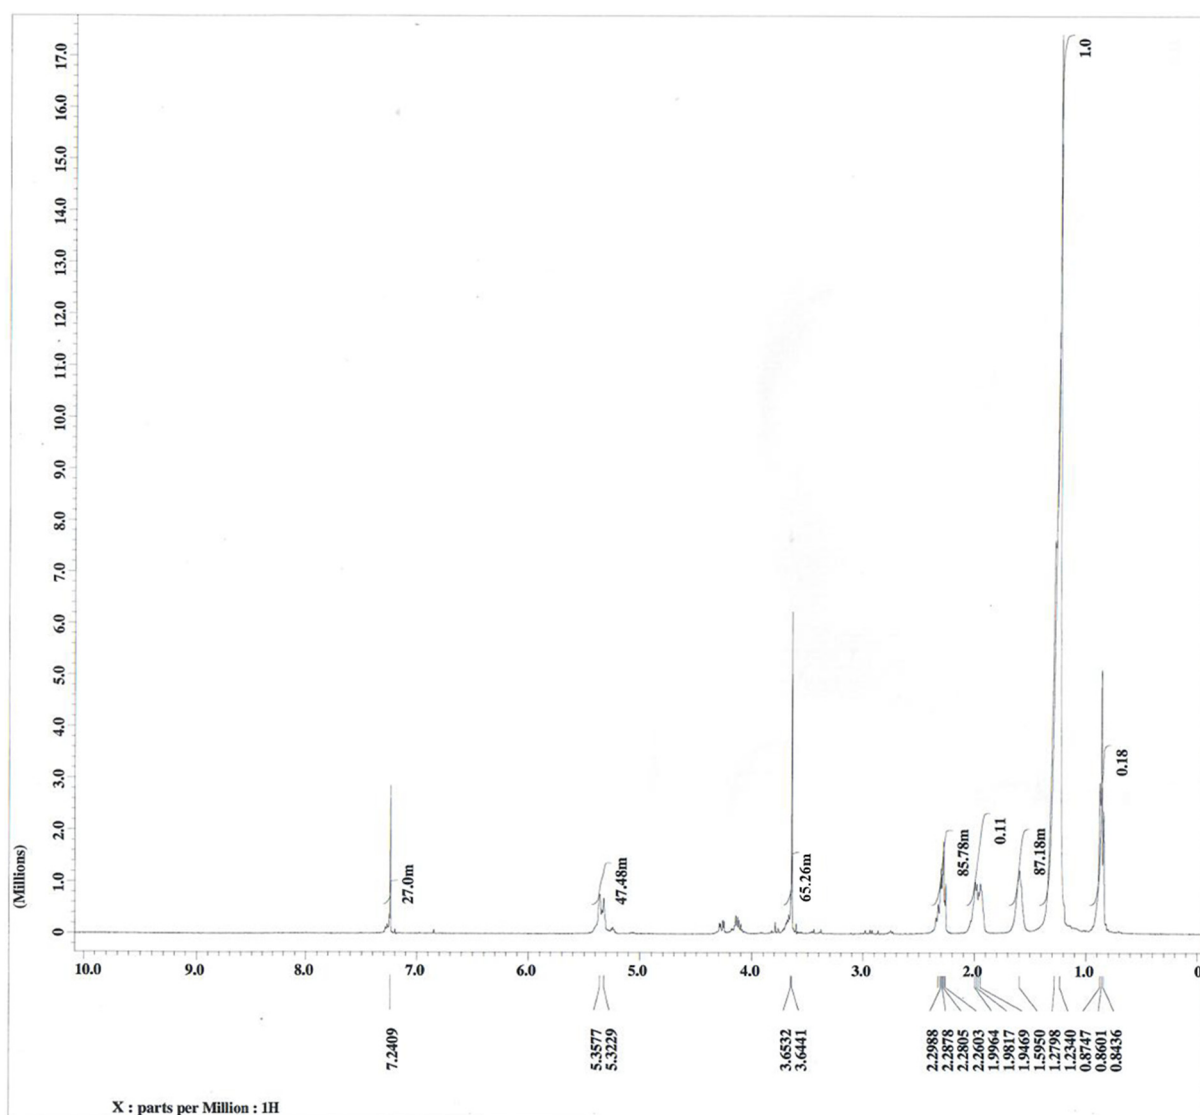

**Figure S8:**  $^1\text{H}$ -NMR spectrum of biodiesel synthesized by transesterification of UVO using MOF-801 catalyst (10 wt.% to oil) at  $180^\circ\text{C}$  in 8 h with methanol to oil 40 wt.%.

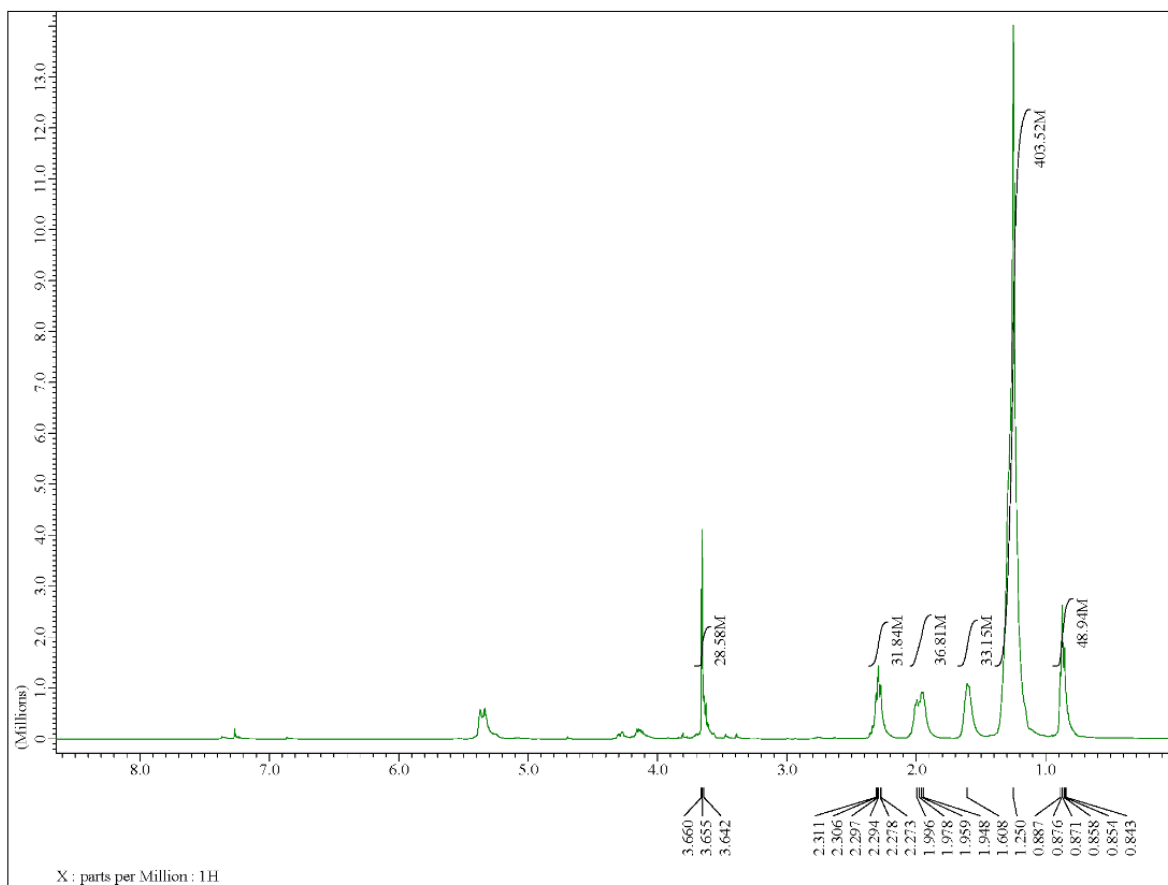

**Figure S9:** <sup>1</sup>H-NMR spectrum of biodiesel synthesized by transesterification of UVO using MOF-801 catalyst (10 wt.% to oil) at 180 °C in 8 h with methanol to oil 50 wt.%.

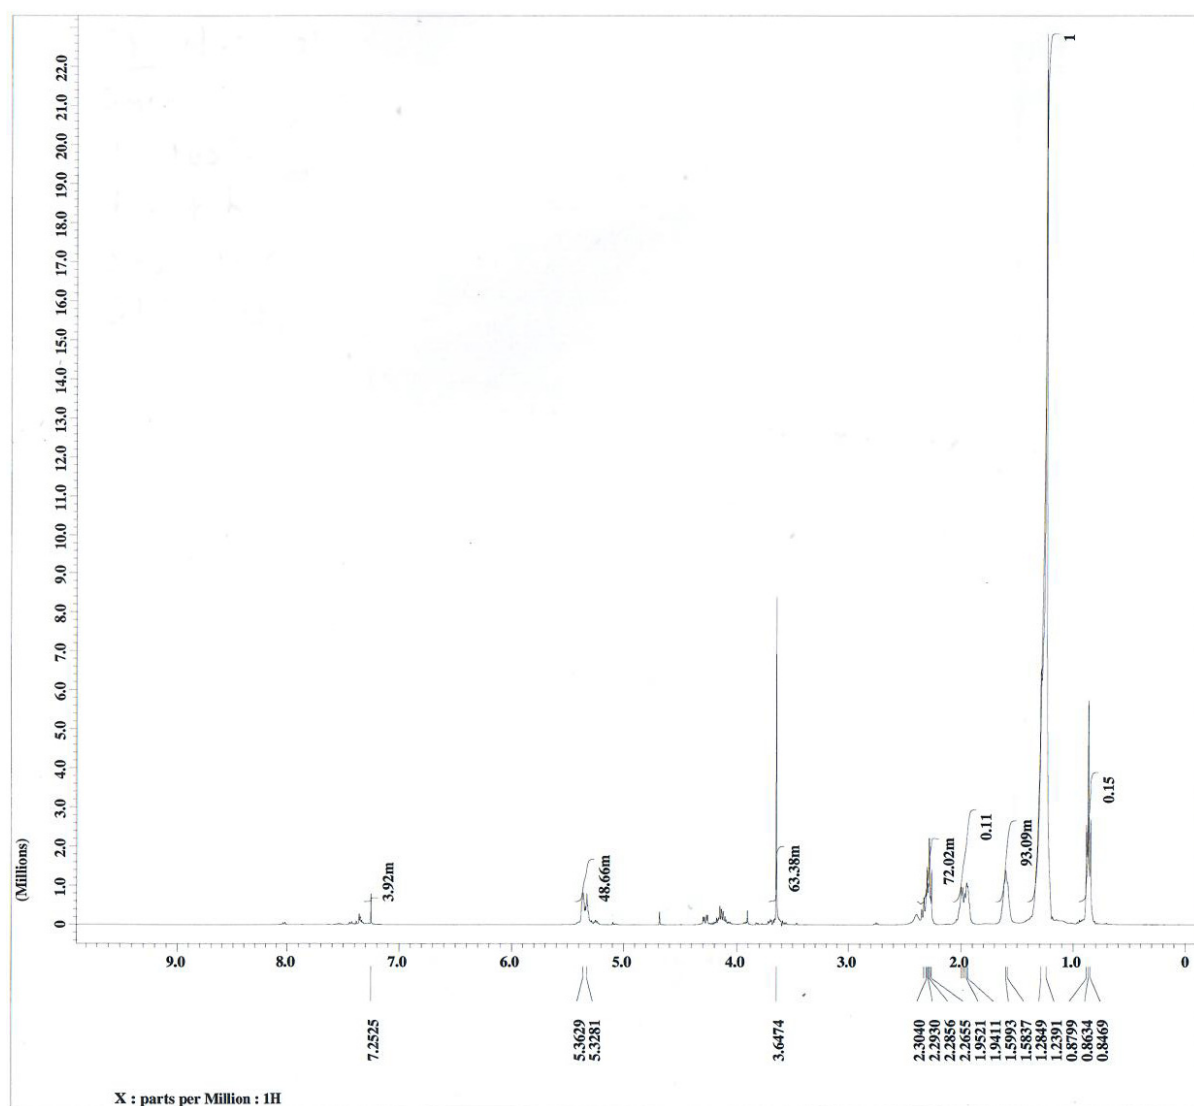

**Figure S10:**  $^1\text{H}$ -NMR spectrum of biodiesel synthesized by transesterification of UVO using MOF-801 catalyst (10 wt.% to oil) at  $180^\circ\text{C}$  in 8 h with methanol to oil 60 wt.%.

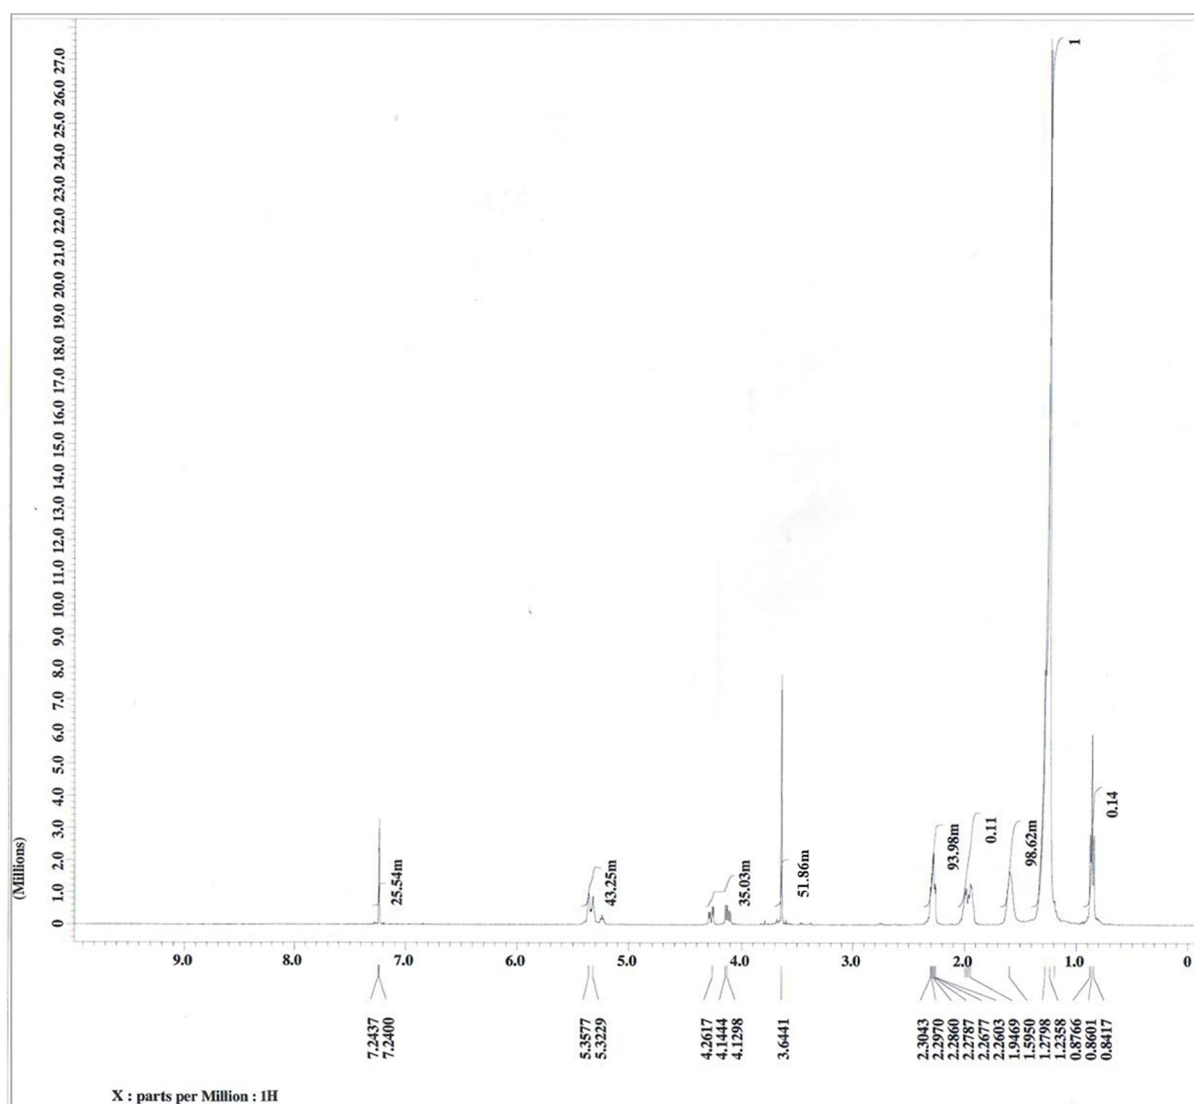

**Figure S11:**  $^1\text{H}$ -NMR spectrum of biodiesel synthesized by transesterification of UVO using MOF-801 catalyst (10 wt.% to oil) at  $180^\circ\text{C}$  in 2 h with methanol to oil 50 wt.%.

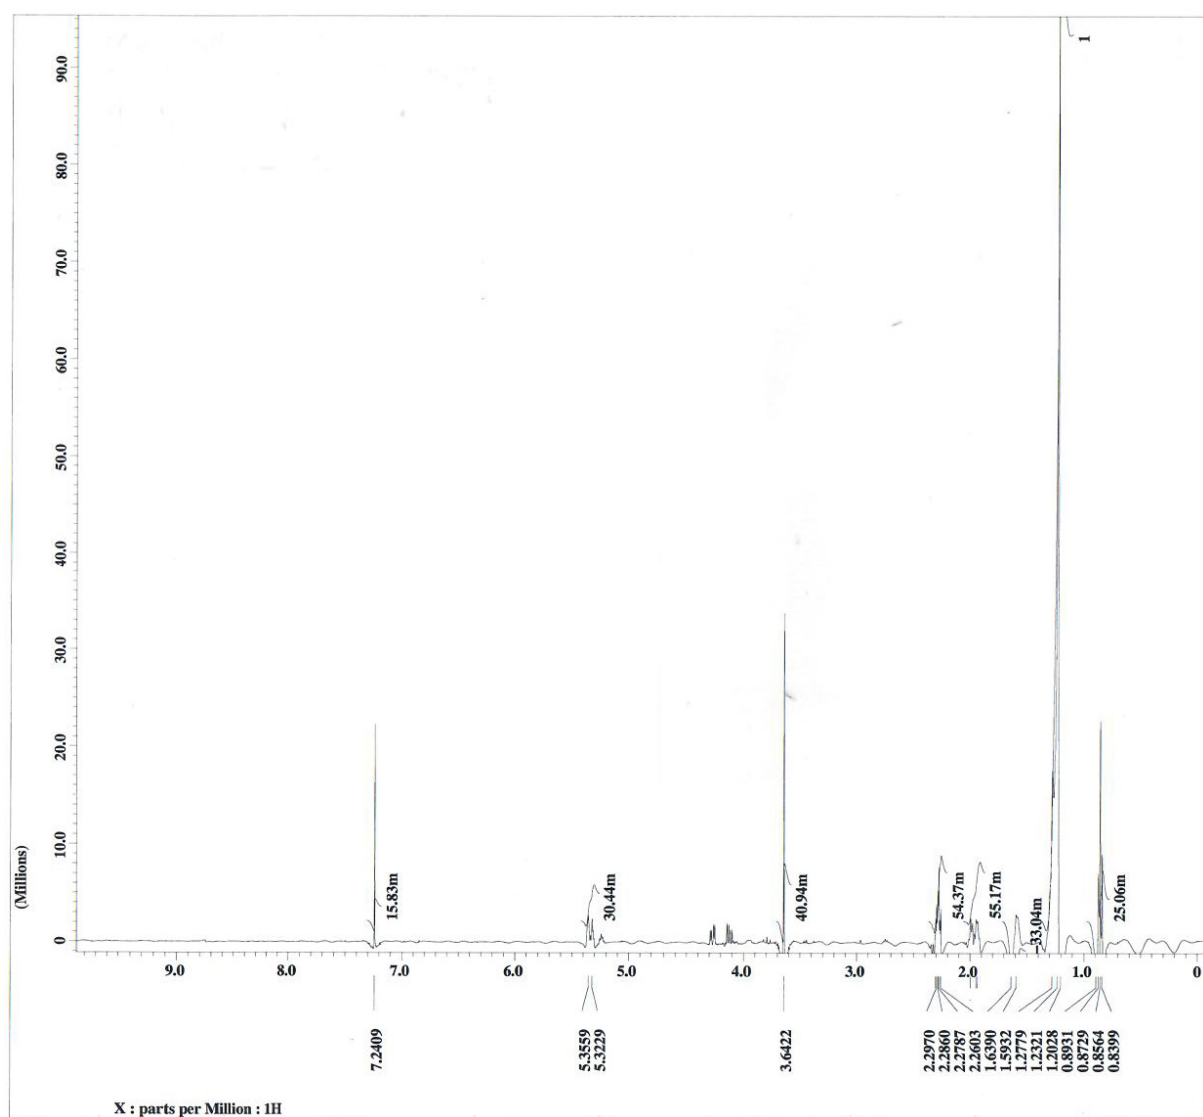

**Figure S12:**  $^1\text{H}$ -NMR spectrum of biodiesel synthesized by transesterification of UVO using MOF-801 catalyst (10 wt.% to oil) at 180 °C in 4 h with methanol to oil 50 wt.%.

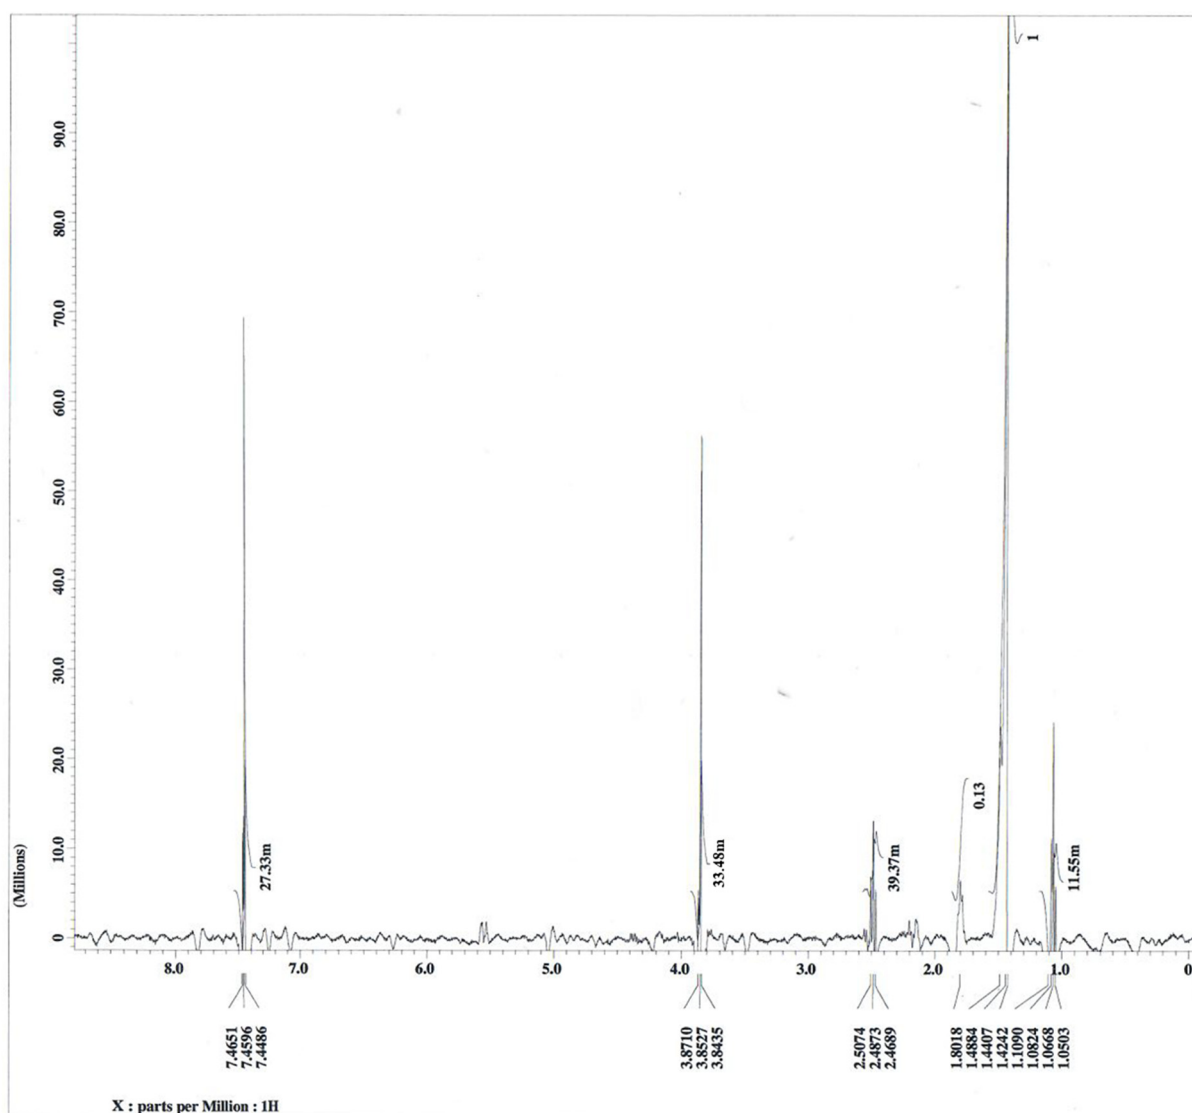

**Figure S13:**  $^1\text{H}$ -NMR spectrum of biodiesel synthesized by transesterification of UVO using MOF-801 catalyst (10 wt.% to oil) at  $180^\circ\text{C}$  in 6 h with methanol to oil 50 wt.%.

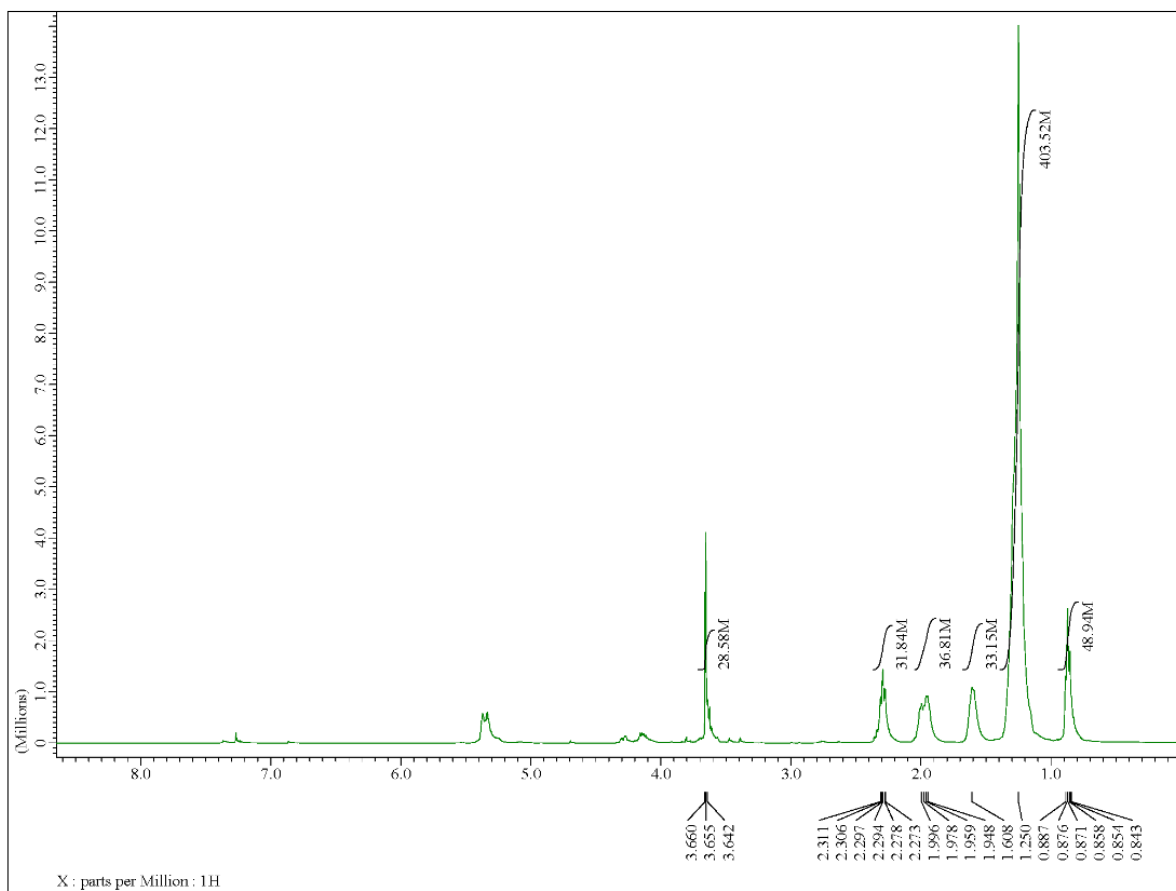

**Figure S14:**  $^1\text{H}$ -NMR spectrum of biodiesel synthesized by transesterification of UVO using MOF-801 catalyst (10 wt.% to oil) at 180 °C in 8 h with methanol to oil 50 wt.%.

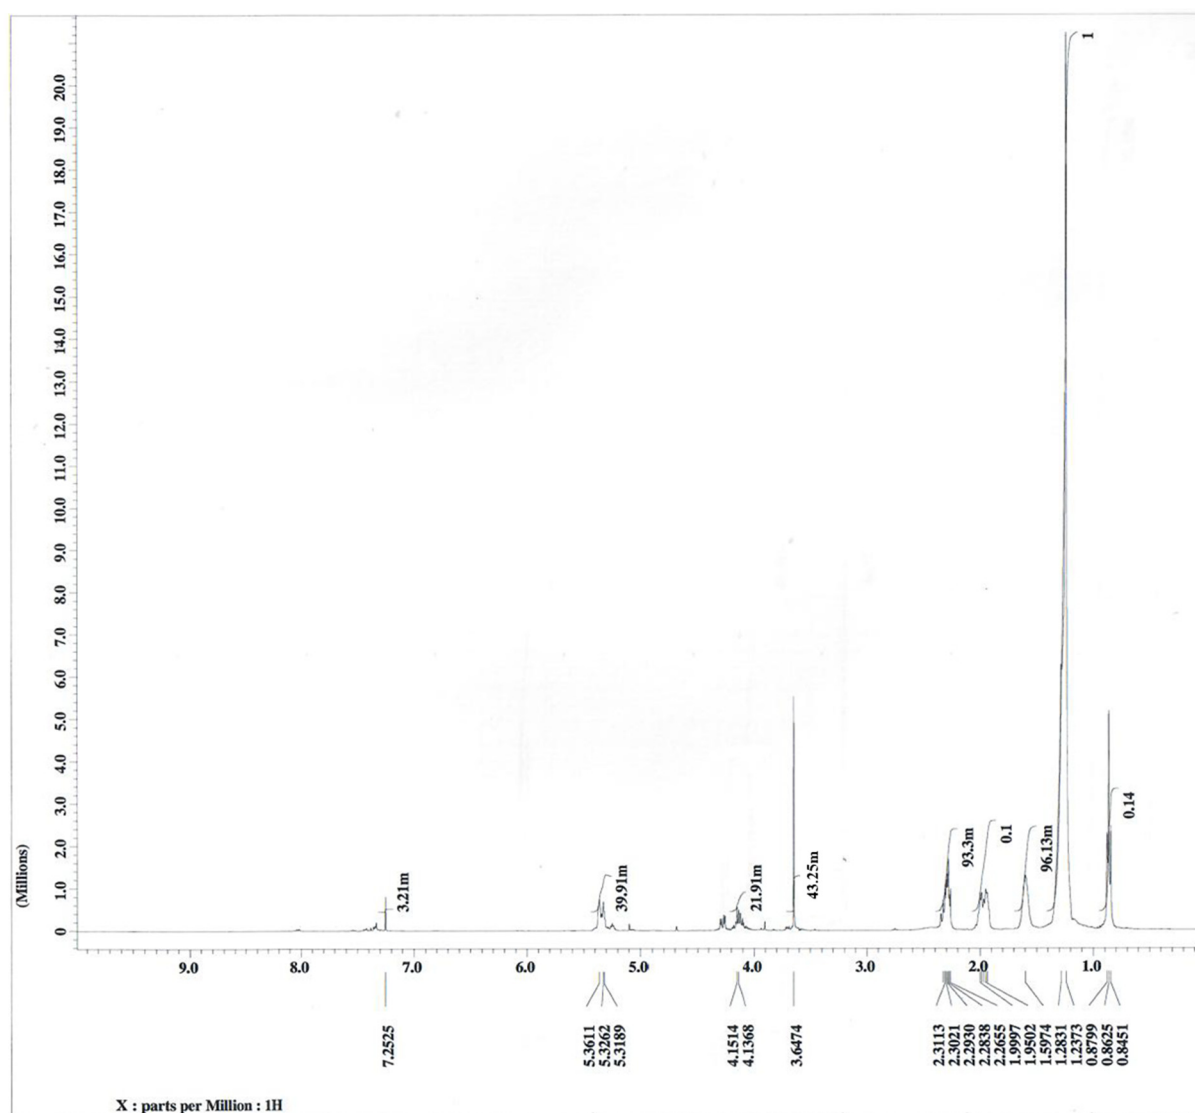

**Figure S15:**  $^1\text{H}$ -NMR spectrum of biodiesel synthesized by transesterification of UVO using MOF-801 catalyst (10 wt.% to oil) at  $140^\circ\text{C}$  in 8 h with methanol to oil 50 wt.%.

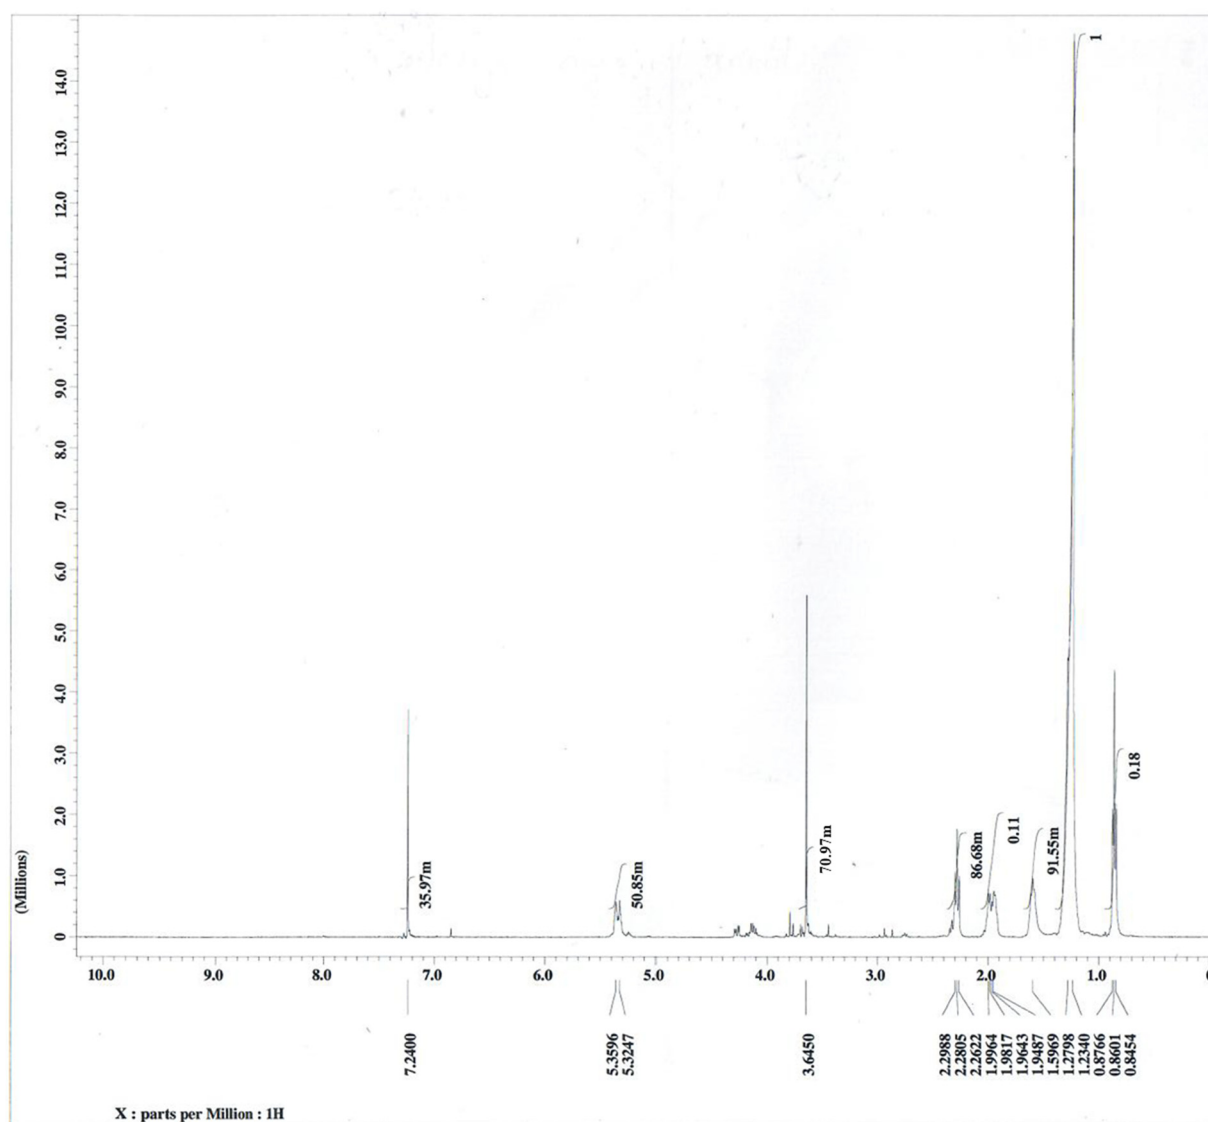

**Figure S16:**  $^1\text{H}$ -NMR spectrum of biodiesel synthesized by transesterification of UVO using MOF-801 catalyst (10 wt.% to oil) at 160 °C in 8 h with methanol to oil 50 wt.%.

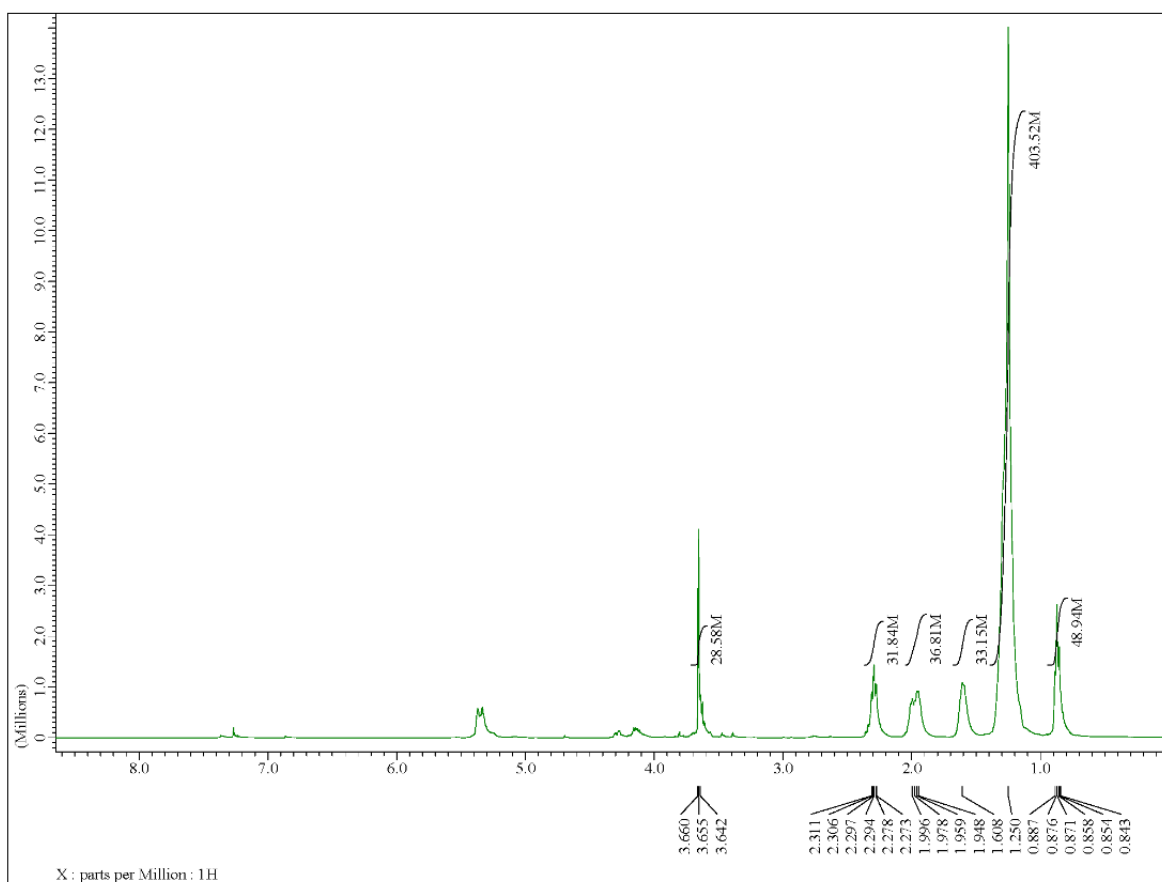

**Figure S17:**  $^1\text{H}$ -NMR spectrum of biodiesel synthesized by transesterification of UVO using MOF-801 catalyst (10 wt.% to oil) at  $180^\circ\text{C}$  in 8 h with methanol to oil 50 wt.%.

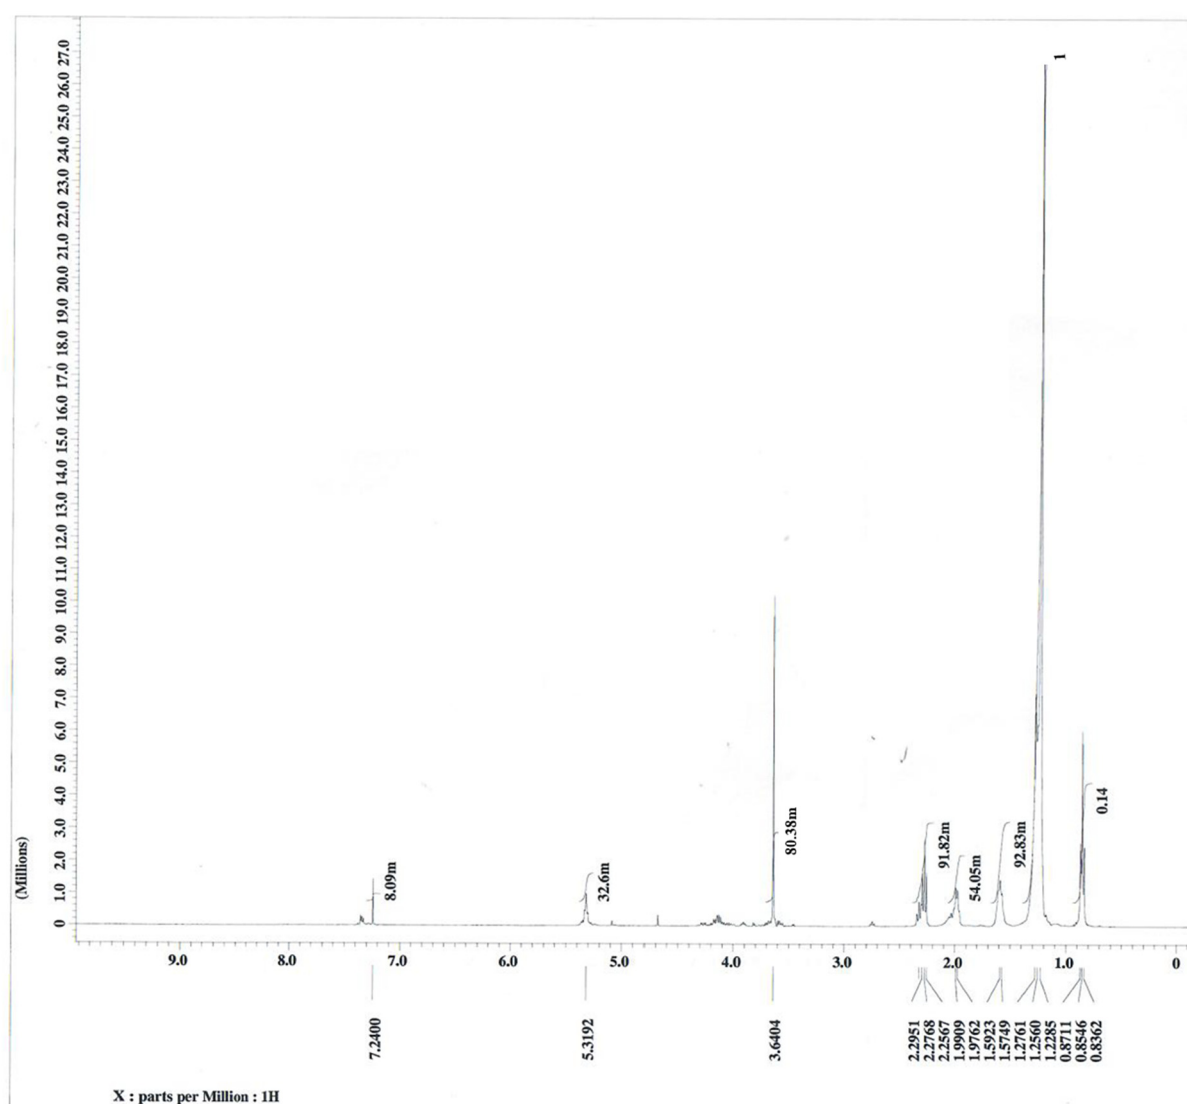

**Figure S18:**  $^1\text{H}$ -NMR spectrum of biodiesel synthesized by transesterification of UVO using MOF-801 catalyst (10 wt.% to oil) at 200 °C in 8 h with methanol to oil 50 wt.%.

## References:

- [1] Ke, F.; Peng, C.; Zhang, T.; Zhang, M.; Zhou, C.; Cai, H.; Zhu, J.; Wan, X. Fumarate-based metal-organic frameworks as a new platform for highly selective removal of fluoride from brick tea. *Scientific Reports* 2018, 8, 939.
